# Supplementary material for: The Evolving Hospital Market in China After the 2009 Healthcare Reform
Source: PubMed Central journal article supplement — Inquiry. 2020 Oct 30;57:0046958020968783. doi: 10.1177/0046958020968783 (PMC7607735; doi:10.1177/0046958020968783), 2020-10-30
Supplement: Appendix_0826.pdf [file Appendix_0826.pdf]

APPENDIX

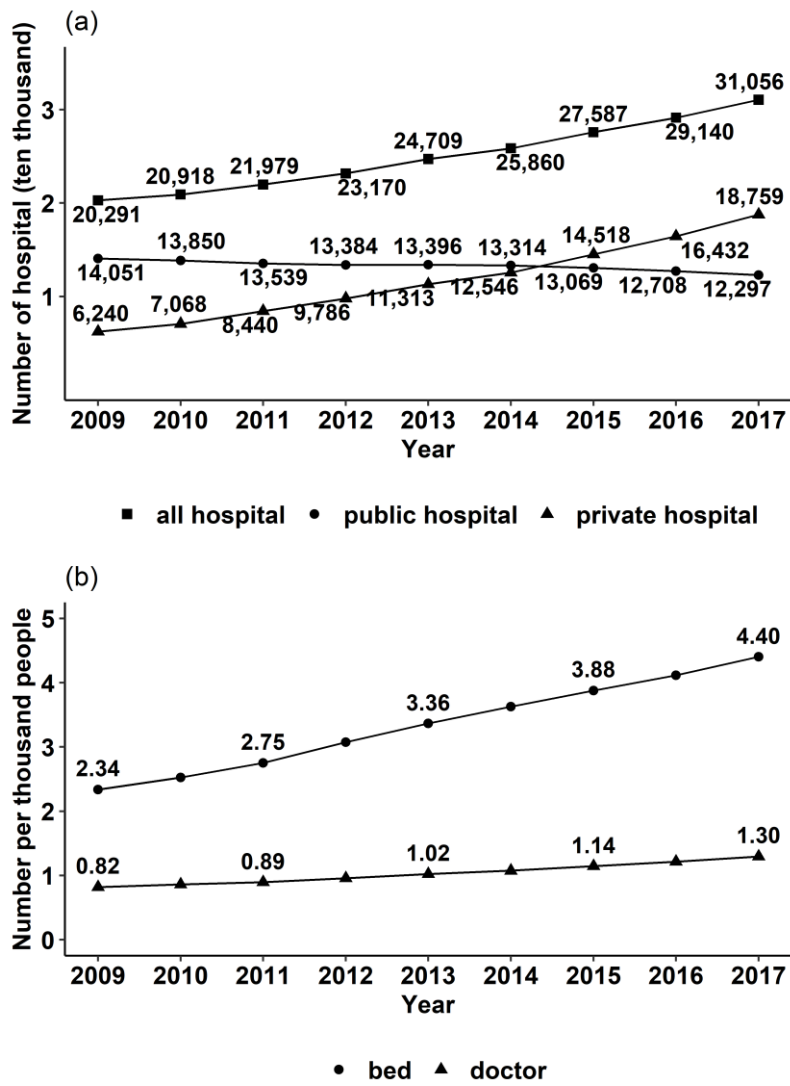

Figure A1. Total hospital number and hospital capacity per thousand people, China, 2009-2017

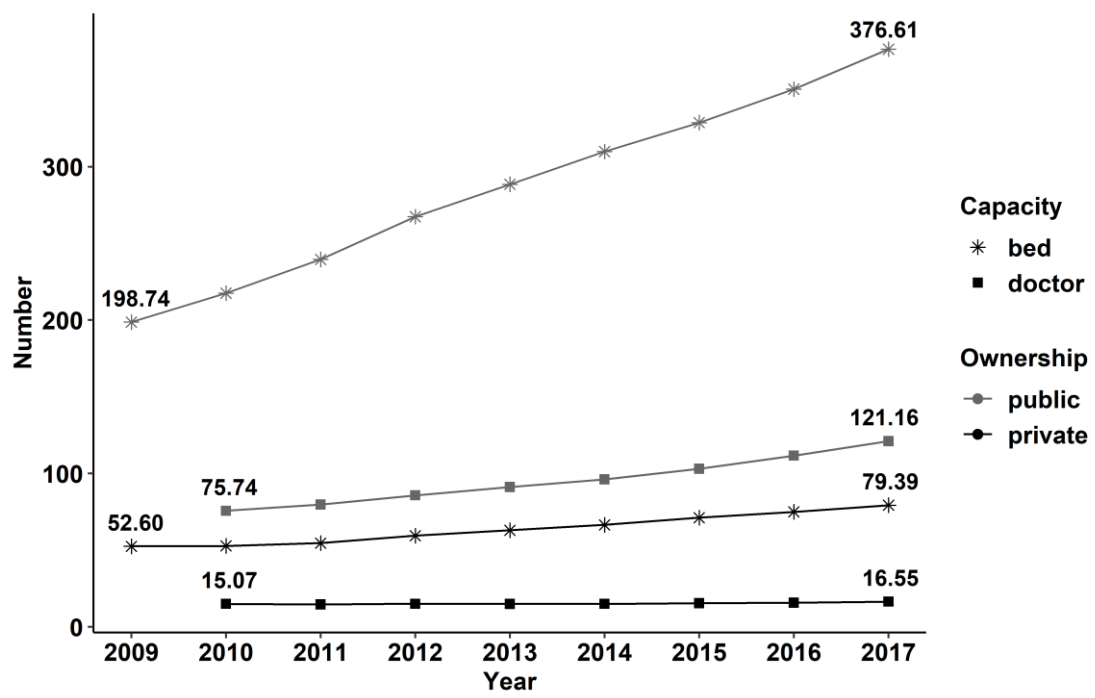

Figure A2. Hospital capacity by ownership types, China, 2009-2017

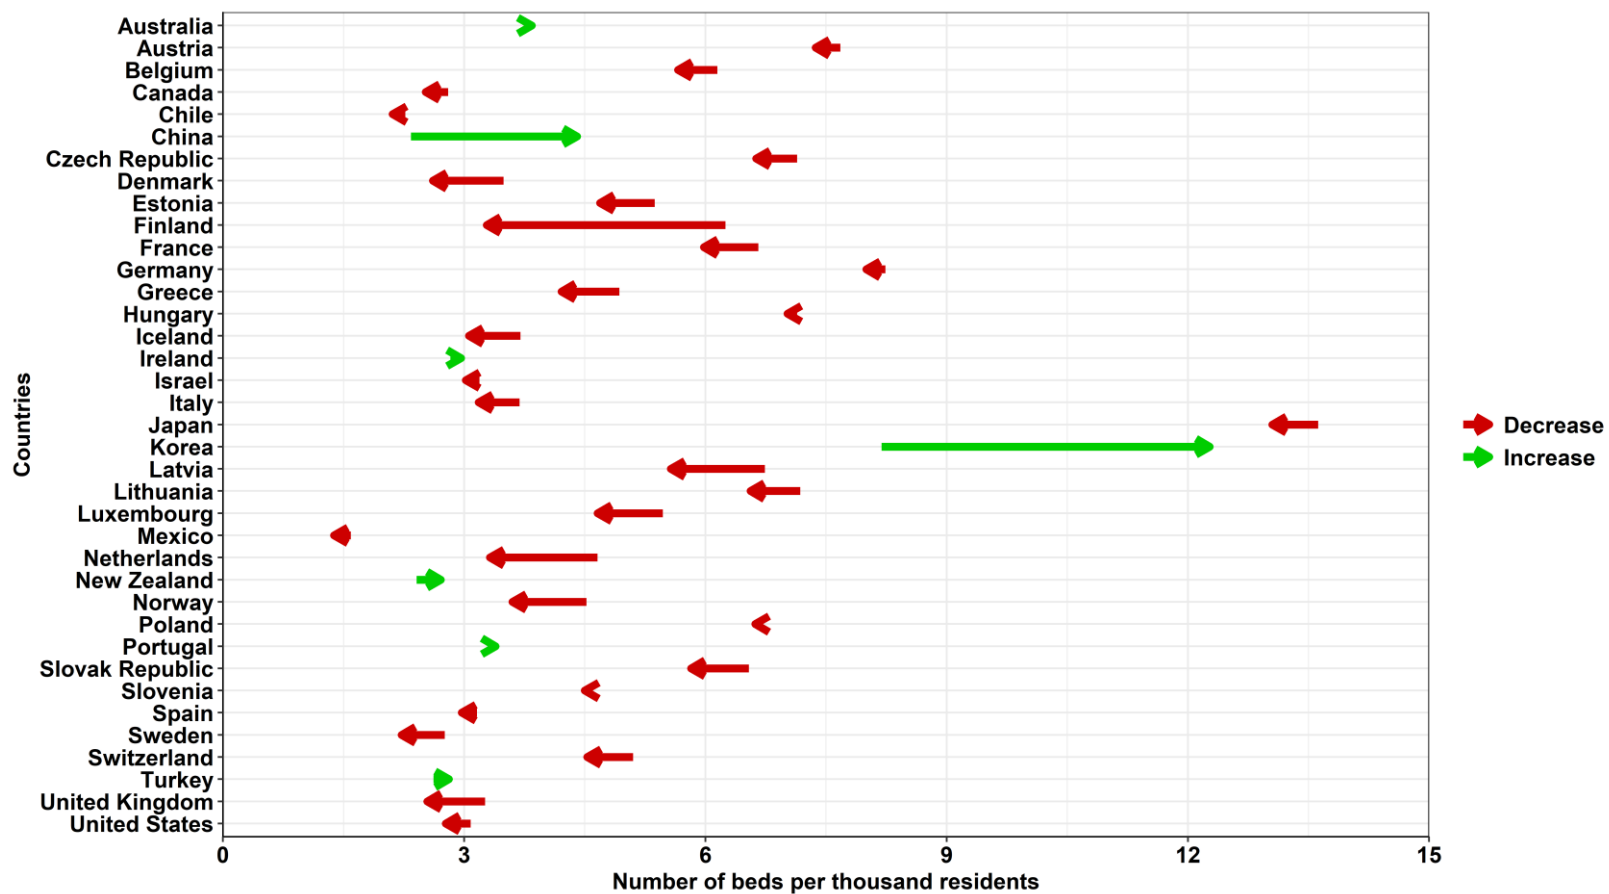

**Figure A3. Changes in hospital beds per thousand residents in China and OECD countries, 2009-2017**

Note: Data for OECD countries was from OECD website (<https://stats.oecd.org/Index.aspx>). The data for Australia and Australia in calendar year 2017 was not available, data in 2016 was used.
